# Supplementary material
Source: PubMed Central journal article supplement (PMC2431106)

## SUPPLEMENTARY TABLES

**Table S1.** Oligonucleotide primers used for real-time PCR quantitation and semi-quantitative PCR of adipocyte gene expression. m, mouse; h, human; f, forward; r, reverse; GPAT1, glycerol 3-phosphate acyltransferase-1; AGPAT2, acylglycerol-3-phosphate acyltransferase-2; DGAT1, diacylglycerol acyltransferase-1; C/EBP $\alpha$ , CCAAT/enhancer-binding protein- $\alpha$ ; LPL, lipoprotein lipase; ACBP, Acyl-CoA binding protein; Insig1, Insulin-induced gene 1; FATP1, fatty acid transport protein-1; aP2, fatty acid binding protein 4; PEPCK1, phosphoenolpyruvate carboxykinase-1; 11 $\beta$ HSD, 11  $\beta$ -hydroxysteroid dehydrogenase type 1; Glut4, glucose transporter4; TBP, TATA box binding protein; HPRT, hypoxanthine phosphoribosyltransferase.

| Primer            | Sequence                                               |
|-------------------|--------------------------------------------------------|
| mLipin-1A         | f – GGTCCCCCAGCCCCAGTCCTT; r - GCAGCCTGTGGCAATTCA      |
| mLipin-1B         | f – CAGCCTGGTAGATTGCCAGA; r - GCAGCCTGTGGCAATTCA       |
| Total mLipin-1    | f – CCCTCGATTTCAACGTACCC; r - GCAGCCTGTGGCAATTCA       |
| mGPAT1            | f – AGCAAGTCCTGCGCTATCAT; r - CTCGTGTGGGTGATTGTGAC     |
| mAGPAT2           | f – GCAACGACAATGGGGACCTG; r - ACAGCATCCAGCACTTGTACC    |
| mDGAT1            | f – GCTACGACGAGTTCTTGAG; r - CTCTGCCACAGATTGAGAC       |
| mC/EBP $\alpha$   | f - GAACAGCAACGAGTACCGGGTA; r – GCCATGGCCTTGACCAAGGAG  |
| mLPL              | f – GGGCTCTGCCTGAGTTGTAG; r - AGAAATTTCGAAGGCCTGGT     |
| mACBP             | f – AGTCACTTCAAACAAGCTACTG; r - CACATAGGTCTTCATGGCACT  |
| mPerilipin        | f – TGAAGGGCACCATCTCTACC; r - CTTCTCGATGCTTCCCAGAG     |
| mInsig1           | f – TCAACCTGCTGCAGATCCAGC; r - AGGACCAGTGTCTCCACATCC   |
| mFATP1            | f – GTGCGTCATCTACGGGTTGAC; r - ACCGGCTGCCTCAGCAGGTA    |
| maP2              | f – GAACCTGGAAGCTTGTCTTCG; r - ACCAGCTTGTACCATCTCG     |
| mPEPCK1           | f – TGGACTTCTCTGCCAAGGTT; r - AGTGAGAGCCAGCCAACAGT     |
| m11 $\beta$ -HSD1 | f – CCCATGCTGAAGCAGAGCAATG; r - TGGTGGAAAAGAACCCATCCAG |
| mHPRT             | f – CACAGGACTAGAACACCTGC; r - GCTGGTGAAAAGGACCTCT      |

|               |                                                        |
|---------------|--------------------------------------------------------|
| mTBP          | f – ACCCTTCACCAATGACTCCTATG; r - ATGATGACTGCAGCAAATCGC |
| mGlut4 exon10 | f – ACTCTTGCCACACAGGCTCT; r - AATGGAGACTGATGCGCTCT     |
| m18S rRNA     | f – ACCGCAGCTAGGAATAATGGA; r - GCCTCAGTTCCGAAAACCA     |
| hLipin-1      | f – TGCTGGAGAGCAGCAGAACTC; r - TAGGGTATGAGGCTGACTGAG   |
| hHPRT         | f – TATGGCGACCCGCAGCCCT; r - CATCTCGAGCAAGACGTTTCAG    |

**Table S2.** Oligonucleotide primers used to prepare *Lpin1* promoter-luciferase reporter constructs. All sequences are shown 5' to 3'. The *KpnI* and *BglII* sites used for cloning are underlined. The position of the 5' nucleotide in the primer relative to the *Lpin1* transcription initiation site is noted.

| Primer | Sequence                                    | Position |
|--------|---------------------------------------------|----------|
| F1     | CGATC <u>GGTACCT</u> GCTTAACCAACACCTCCGCTCA | - 2045   |
| F2     | CGATC <u>GGTACCGGTAAGGGCTTTGGGCTGGACTT</u>  | - 1564   |
| F3     | CGATC <u>GGTACCCGCACCCGTCATCATTCTGACCT</u>  | - 940    |
| F4     | CGATC <u>GGTACCTGTTGGTCTACGAGACCCCAGGT</u>  | - 823    |
| F5     | CGATC <u>GGTACCTCCTTCCTGGCTCTGCTGACTGG</u>  | - 421    |
| F6     | CGATC <u>GGTACCTCAAACAGGGTCAGGCTGTGGA</u>   | - 285    |
| F7     | CGATC <u>GGTACCCTTTGGCTGCCTACTCCCTGGAA</u>  | - 253    |
| R1     | CGATC <u>CAGATCT</u> CGGGTCCCCATTGCTACTCACC | + 70     |

## Supplemental Figure Legends

### **Figure S1. Lipin-1A is regulated by glucocorticoids at the transcriptional level.**

Data in panels A-C are for lipin-1A; the analogous experiments for lipin-1B are presented in Fig. 3, panels A-C. **A**, induction of lipin-1A expression by DEX is inhibited by the RNA synthesis inhibitor actinomycin D (ACTD). Confluent 3T3-L1 preadipocytes were treated with the indicated concentration of DEX in the absence or presence of ACTD for 4 h. **B**, induction of lipin-1A was not inhibited by the protein synthesis inhibitor cycloheximide (CHX). Confluent 3T3-L1 preadipocytes were treated with the indicated concentration of DEX in the absence or presence of CHX for 4 h. **C**, induction of lipin-1A was inhibited by the glucocorticoid receptor antagonist RU486. Confluent 3T3-L1 preadipocytes were treated with the indicated concentration of DEX in the absence or presence of RU486 for 4 h. **D**, human primary adipocytes differentiated for 7 days and then treated with 1 $\mu$ M DEX in the absence or presence of 1 $\mu$ M RU486 for 4 h. Levels of total lipin-1 mRNA are shown. For all studies, values represent the mean  $\pm$  SD for 3 samples. \*,  $p < 0.05$ ; \*\*,  $p < 0.01$  vs. controls or for comparisons indicated.

### **Figure S2. The GRE in the *Lpin1* promoter activates expression in Hepa 1-6 hepatocytes.**

**A**, transcriptional activity of *Lpin1* promoter-luciferase constructs under treatment with vehicle (DMSO) or DEX (1  $\mu$ M) for 24 h. Experiments were performed as in Figure 5 using Hepa 1-6 cells. Data represent the mean  $\pm$  SE of 4 samples, expressed as the ratio of the *Lpin1* promoter segment to that of the pGL3-basic vector. **B**, effect of 1  $\mu$ M DEX on *Lpin1* promoter-luciferase constructs containing wild-type (wt) and mutant (mt) versions of the GRE sequence.  $n = 3$ ; \*,  $p < 0.05$  vs. DMSO treated cells.

Figure S1

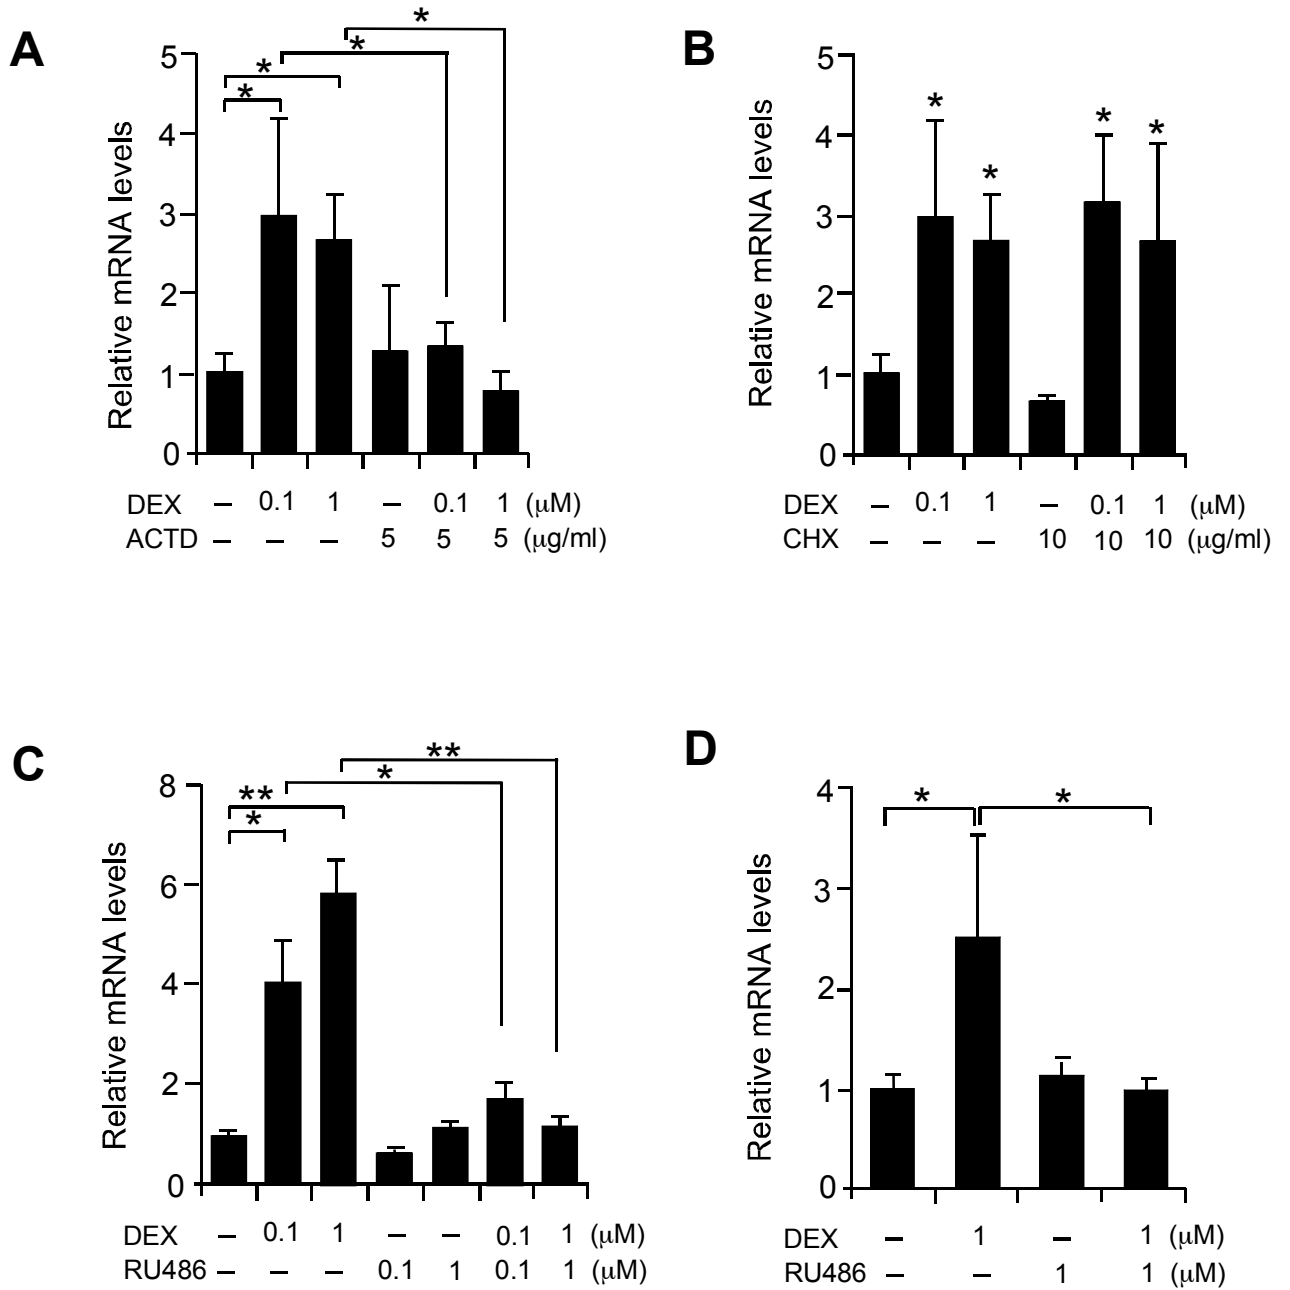

# Figure S2

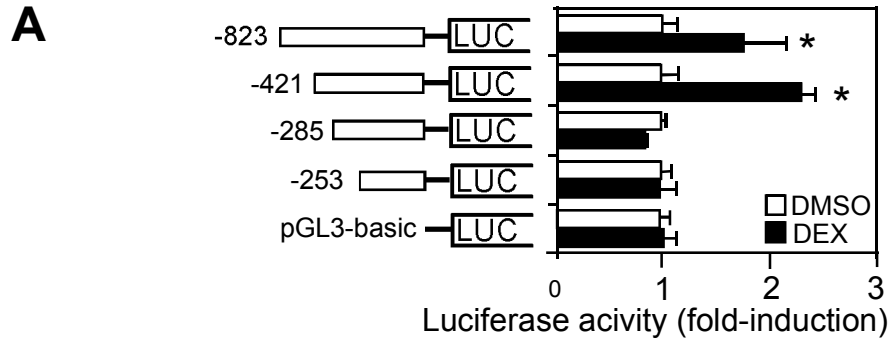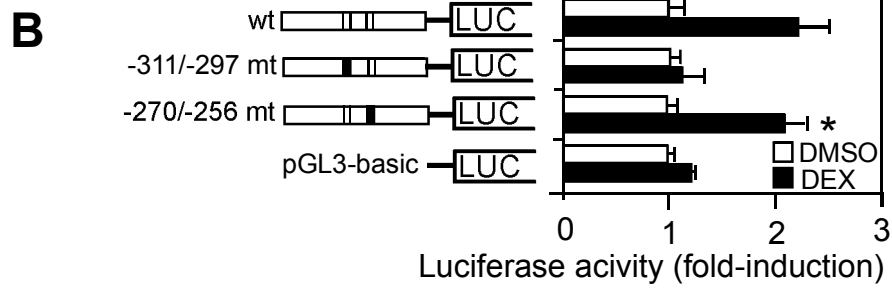

Supplement: M800061-JLR200_1.pdf [file M800061-JLR200_1.pdf]
